# Supplementary material
Source: PubMed Central journal article supplement (PMC3462244)
Supplement: NIHMS405184-supplement-1_si_001.pdf [file NIHMS405184-supplement-1_si_001.pdf]

## Supporting Information

### **Molecular Fingerprint-based Artificial Neural Networks QSAR for Ligand Biological Activity Predictions**

*Kyaw-Zeyar Myint, Lirong Wang, Qin Tong and Xiang-Qun Xie.*

#### Contents

Figure SF1. Cross-validation results of three FANN-QSAR models on ACE data set

Figure SF2. Cross-validation results of three FANN-QSAR models on AchE data set

Figure SF3. Cross-validation results of three FANN-QSAR models on BZR data set

Figure SF4. Cross-validation results of three FANN-QSAR models on COX2 data set

Figure SF5. Cross-validation results of three FANN-QSAR models on DHFR data set

Figure SF6. Distributions of experimental binding affinities of training compounds (CBID database) and predicted binding affinities for NCI compounds

Table ST1. Twenty rounds of model training and cross-validation results using CB2 ligand data set before testing compounds from NCI database

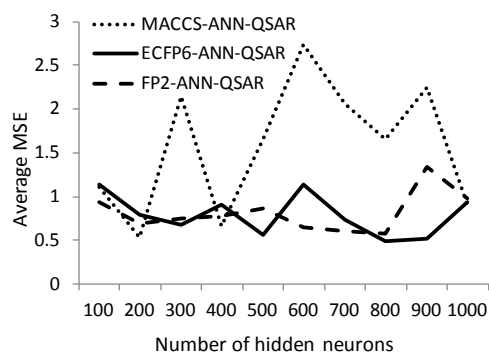

|                | Optimal no. of hidden neurons | Training Set MSE | Test Set MSE | Average MSE |
|----------------|-------------------------------|------------------|--------------|-------------|
| ECFP6-ANN-QSAR | 800                           | 0.208            | 0.770        | 0.489       |
| FP2-ANN-QSAR   | 800                           | 0.368            | 0.789        | 0.579       |
| MACCS-ANN-QSAR | 200                           | 0.337            | 0.742        | 0.539       |

Figure SF1. Cross-validation results of three FANN-QSAR models on ACE data set

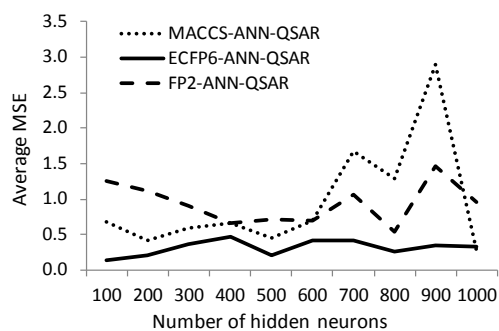

|                | Optimal no. of hidden neurons | Training Set MSE | Test Set MSE | Average MSE |
|----------------|-------------------------------|------------------|--------------|-------------|
| ECFP6-ANN-QSAR | 100                           | 0.100            | 0.184        | 0.142       |
| FP2-ANN-QSAR   | 800                           | 0.381            | 0.685        | 0.533       |
| MACCS-ANN-QSAR | 1000                          | 0.176            | 0.391        | 0.283       |

Figure SF2. Cross-validation results of three FANN-QSAR models on AchE data set

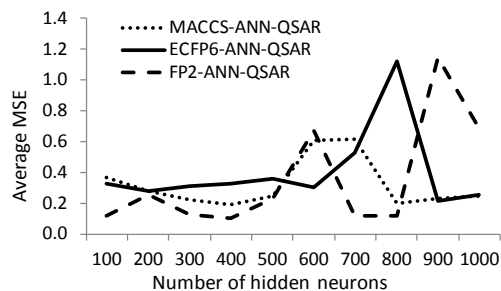

|                | Optimal no. of hidden neurons | Training Set MSE | Test Set MSE | Average MSE |
|----------------|-------------------------------|------------------|--------------|-------------|
| ECFP6-ANN-QSAR | 900                           | 0.100            | 0.332        | 0.216       |
| FP2-ANN-QSAR   | 400                           | 0.100            | 0.104        | 0.102       |
| MACCS-ANN-QSAR | 400                           | 0.100            | 0.285        | 0.193       |

Figure SF3. Cross-validation results of three FANN-QSAR models on BZR data set

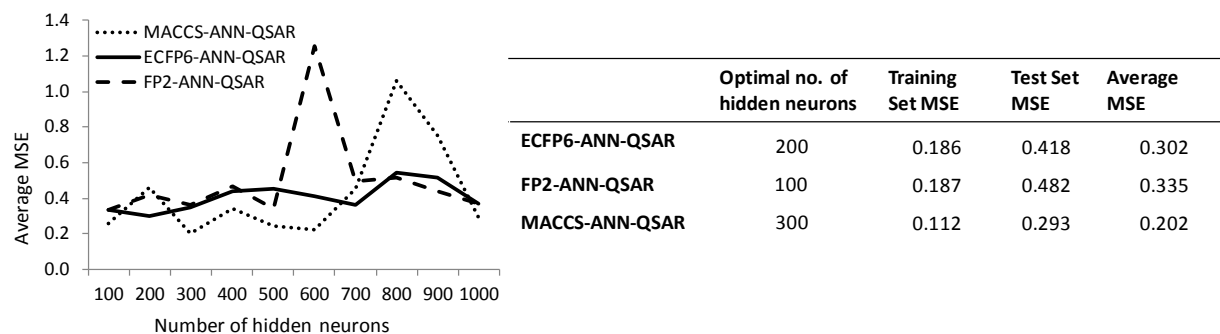

Figure SF4. Cross-validation results of three FANN-QSAR models on COX2 data set

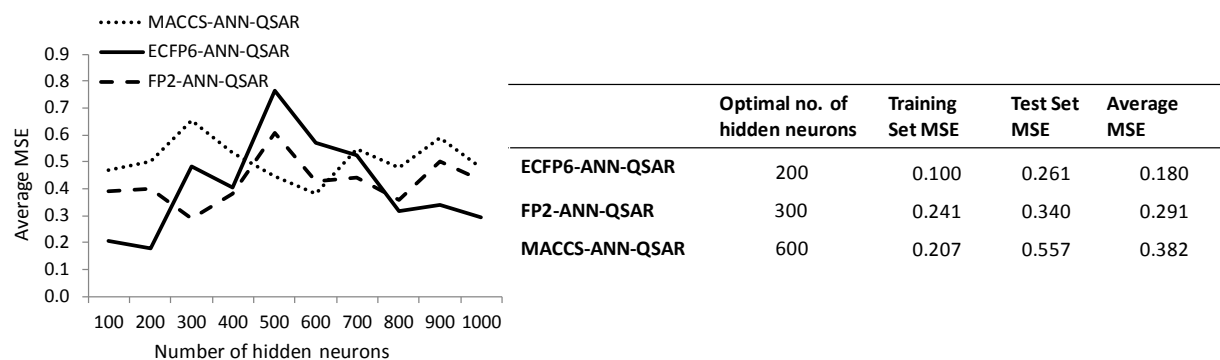

Figure SF5. Cross-validation results of three FANN-QSAR models on DHFR data set

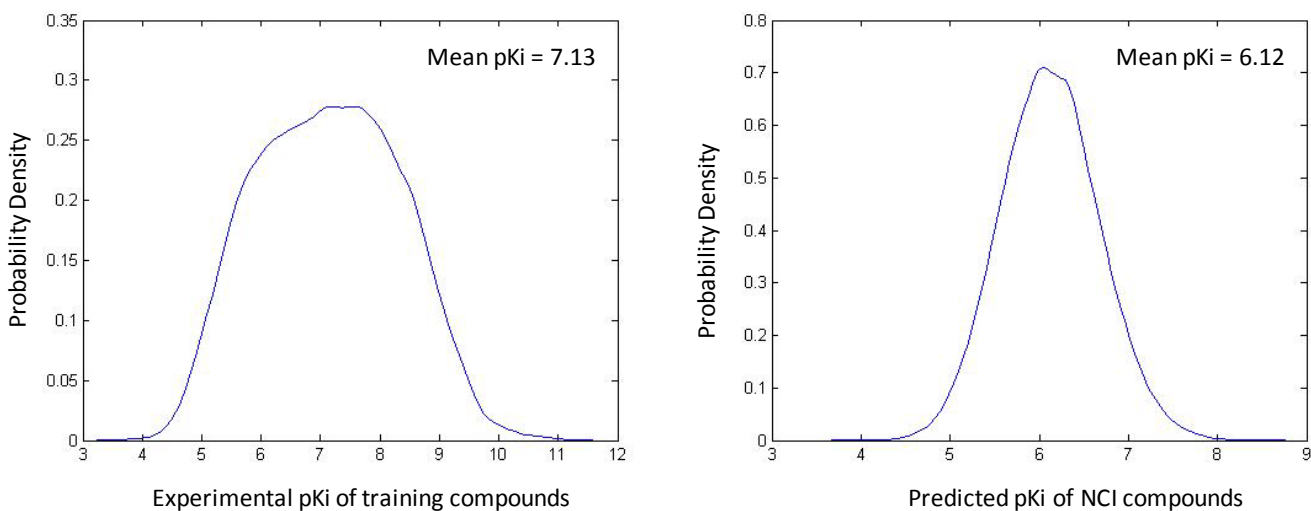

Figure SF6. Distributions of experimental binding affinities of training compounds (CBID database) and predicted binding affinities for NCI compounds

| Round | Training MSE | Validation MSE | Avg. MSE | Optimal No. of Hidden Neurons | r <sup>2</sup> training | r <sup>2</sup> validation |
|-------|--------------|----------------|----------|-------------------------------|-------------------------|---------------------------|
| 1     | 0.169        | 0.733          | 0.451    | 1000                          | 0.87                    | 0.47                      |
| 2     | 0.126        | 0.832          | 0.479    | 500                           | 0.91                    | 0.49                      |
| 3     | 0.362        | 0.645          | 0.504    | 600                           | 0.74                    | 0.53                      |
| 4     | 0.262        | 0.555          | 0.409    | 400                           | 0.81                    | 0.59                      |
| 5     | 0.332        | 0.776          | 0.554    | 800                           | 0.74                    | 0.49                      |
| 6     | 0.214        | 0.830          | 0.522    | 200                           | 0.84                    | 0.41                      |
| 7     | 0.207        | 0.622          | 0.415    | 500                           | 0.85                    | 0.56                      |
| 8     | 0.181        | 0.764          | 0.472    | 400                           | 0.87                    | 0.51                      |
| 9     | 0.255        | 0.563          | 0.409    | 800                           | 0.82                    | 0.60                      |
| 10    | 0.227        | 0.713          | 0.470    | 900                           | 0.84                    | 0.52                      |
| 11    | 0.217        | 0.636          | 0.427    | 600                           | 0.83                    | 0.51                      |
| 12    | 0.239        | 0.832          | 0.535    | 600                           | 0.82                    | 0.50                      |
| 13    | 0.185        | 0.729          | 0.457    | 800                           | 0.87                    | 0.43                      |
| 14    | 0.137        | 0.656          | 0.396    | 400                           | 0.90                    | 0.54                      |
| 15    | 0.389        | 0.565          | 0.477    | 900                           | 0.70                    | 0.55                      |
| 16    | 0.159        | 0.727          | 0.443    | 500                           | 0.87                    | 0.50                      |
| 17    | 0.303        | 0.709          | 0.506    | 500                           | 0.78                    | 0.50                      |
| 18    | 0.182        | 0.515          | 0.348    | 600                           | 0.87                    | 0.64                      |
| 19    | 0.219        | 0.681          | 0.450    | 900                           | 0.83                    | 0.53                      |
| 20    | 0.208        | 0.567          | 0.388    | 1000                          | 0.85                    | 0.53                      |

Table ST1. Twenty rounds of model training and cross-validation results using CB<sub>2</sub> ligand data set before testing compounds from NCI database
